# Supplementary material for: Selective hydrogenation of CO2 to formic acid with higher yield in an aqueous medium with a nano-nickel-metal catalyst: reaction parameter optimization by response surface methodology (RSM)
Source: Royal Society of Chemistry journal article supplement (doi:10.1039/d4re00194j), 2024-01-01
Supplement: d4re00194j1.pdf [file d4re00194j1.pdf]

## Supplementary materials

**Selective hydrogenation of CO<sub>2</sub> to formic acid with higher yield in an aqueous medium  
with a nano-nickel-metal catalyst: reaction parameter optimization by response  
surface methodology (RSM)**

Rajeev Ranjan, Prakash Biswas\*, and K. K. Pant

### Affiliation

Department of Chemical Engineering, Indian Institute of Technology Roorkee,  
Roorkee-247667, Uttarakhand, India

\*Corresponding author: Tel.: (+91)-1332-28-5820

Email: [prakash.biswas@ch.iitr.ac.in](mailto:prakash.biswas@ch.iitr.ac.in); [prakashbiswas@gmail.com](mailto:prakashbiswas@gmail.com)

## Contents

1. N<sub>2</sub> adsorption-desorption isotherm of nano-nickel catalyst
2. FTIR spectrum of NiO-SG catalyst
3. DR-UV-vis spectra of NiO-SG catalyst
4. FE-SEM images with EDX of catalysts
5. Catalyst screening for the CO<sub>2</sub> hydrogenation to formic acid
6. <sup>1</sup>H NMR of the reaction mixture
7. XRD pattern of nano-nickel catalyst
8. Formic acid yield for recycles experiments
9. Results obtained from CO<sub>2</sub>-TPD for basic sites
10. Selected factors with their corresponding coded values

References

# 1. N<sub>2</sub> adsorption-desorption isotherm of nano-nickel catalyst

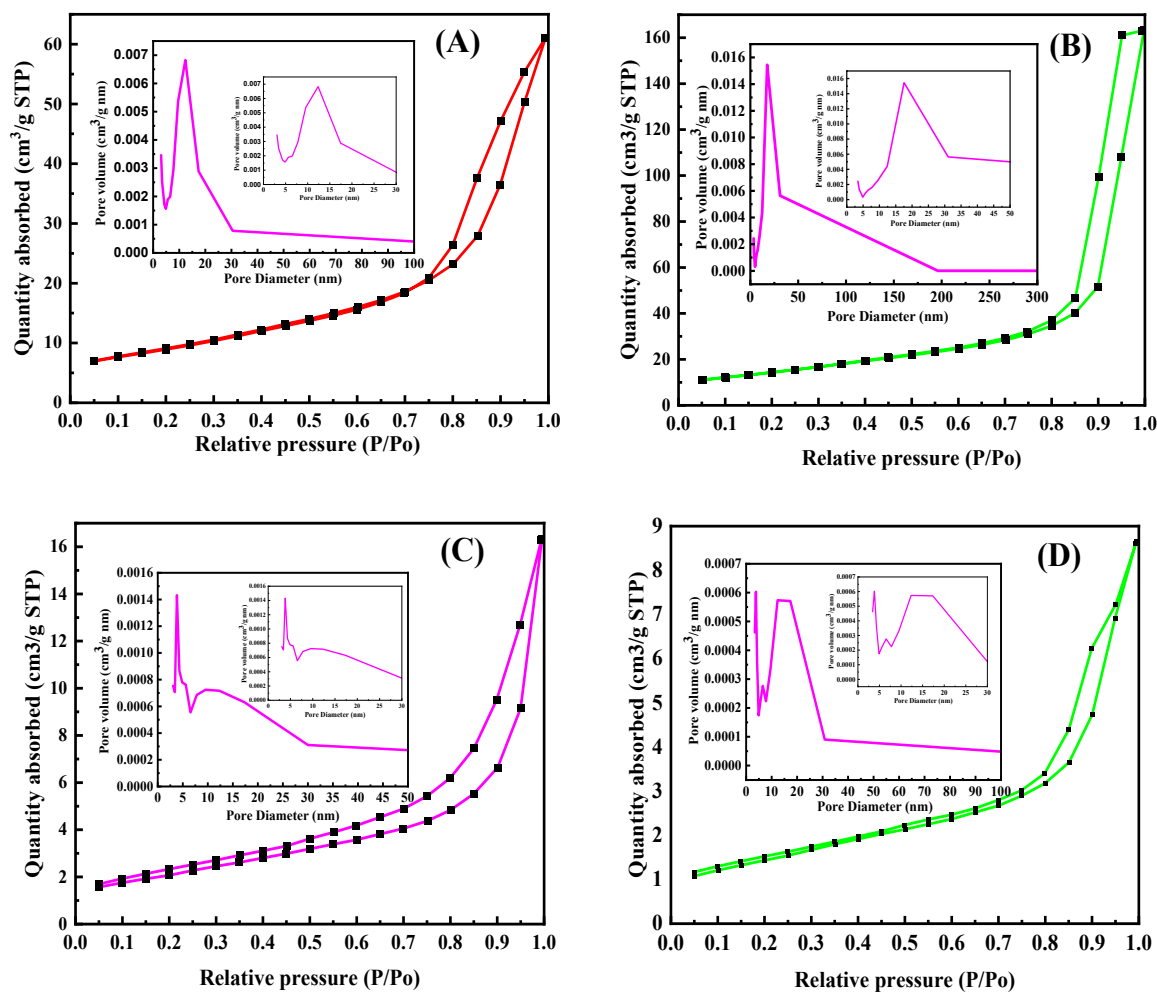

**Figure S1.** N<sub>2</sub> adsorption-desorption isotherm of nano-nickel catalyst (a) NiO-PM, (b) NiO-HT, (c) NiO-SG, (d) NiO-DC.

## 2. FTIR spectrum of NiO-SG catalyst

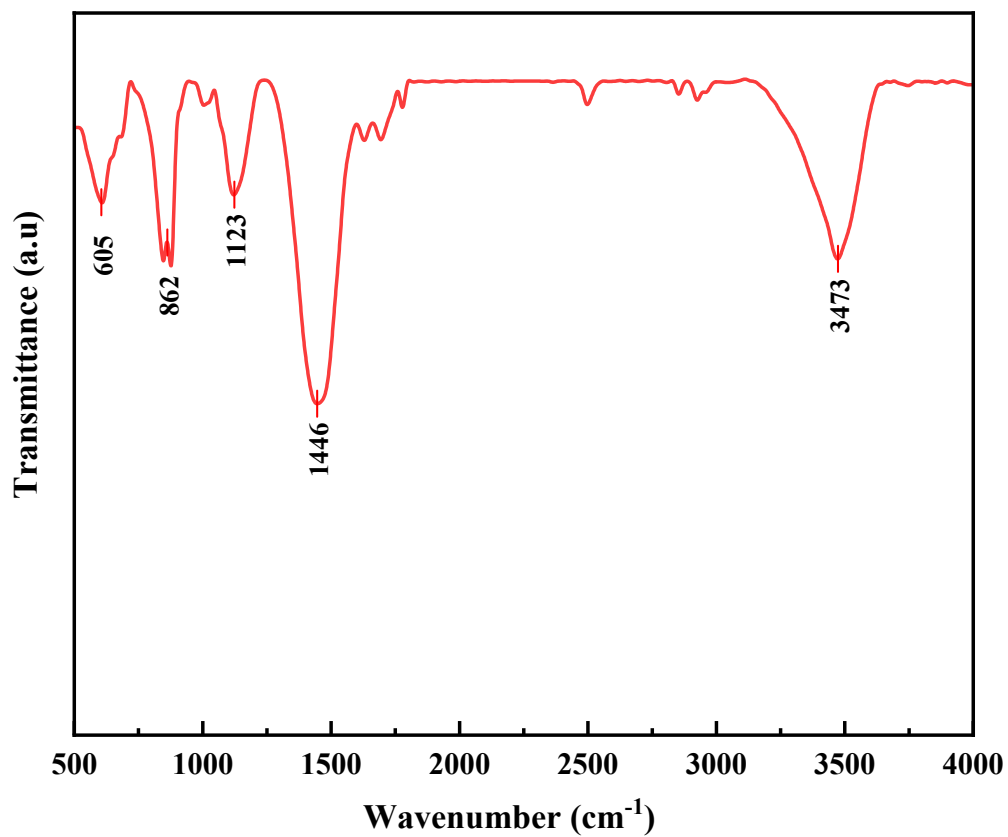

**Figure S2.** FTIR spectra of NiO-SG catalyst<sup>1,2</sup>.

### 3. DR-UV-vis spectra of NiO-SG catalyst

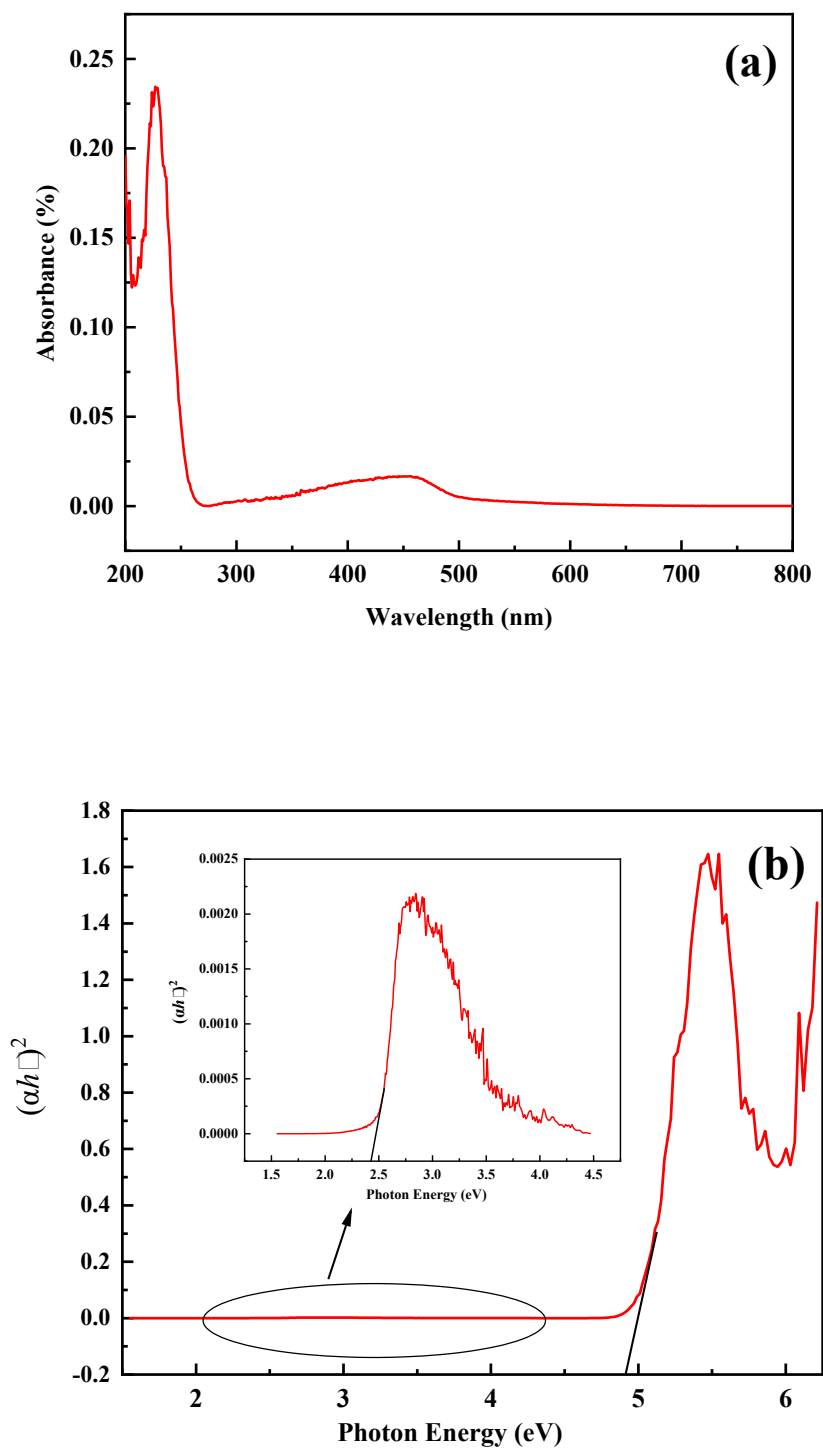

**Figure S3.** (a) UV-vis diffuse reflectance spectra (DRS) of NiO-SG catalyst, (b) Tauc plot of NiO-SG catalyst<sup>3,4</sup>.

#### 4. FE-SEM images with EDX of catalysts

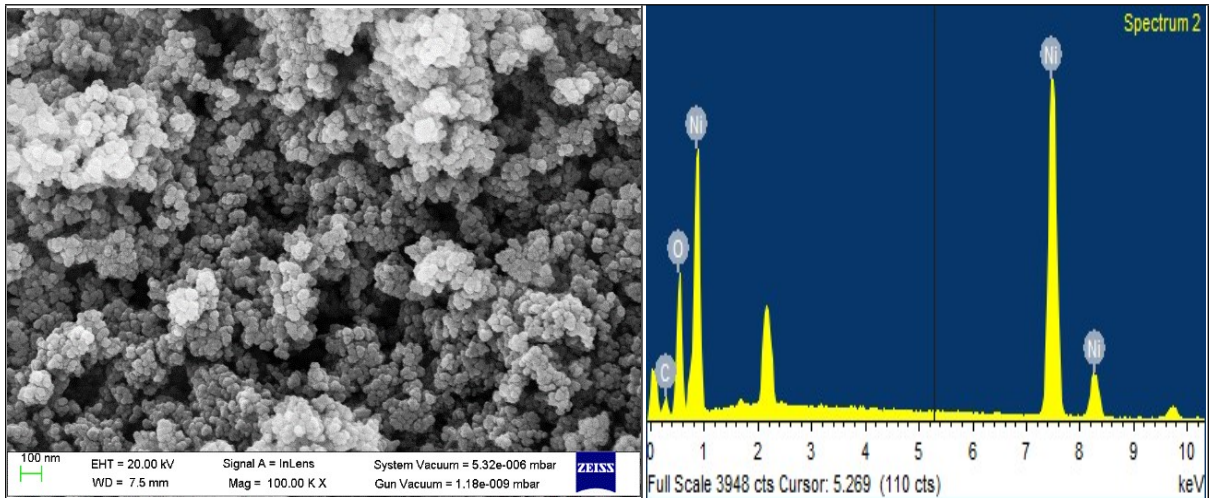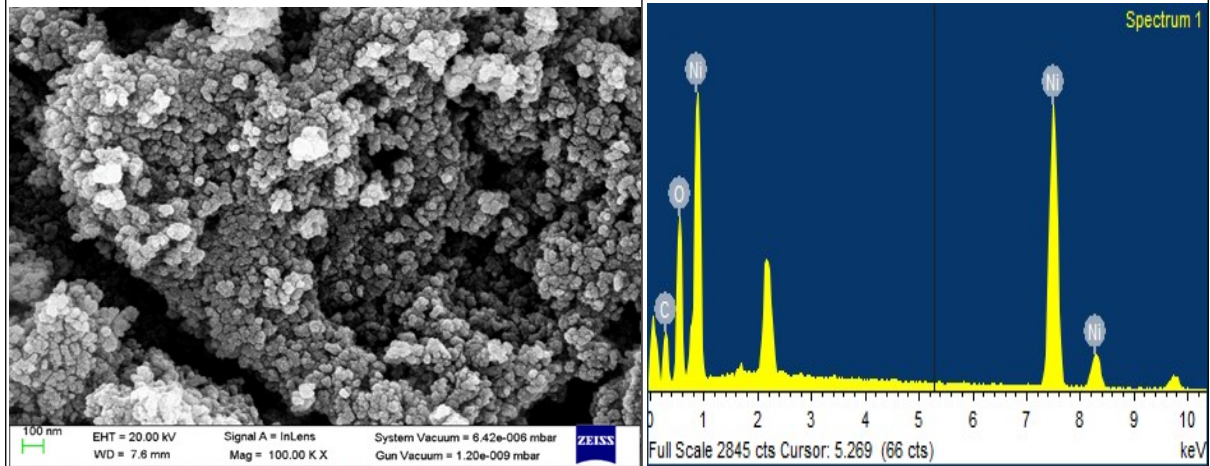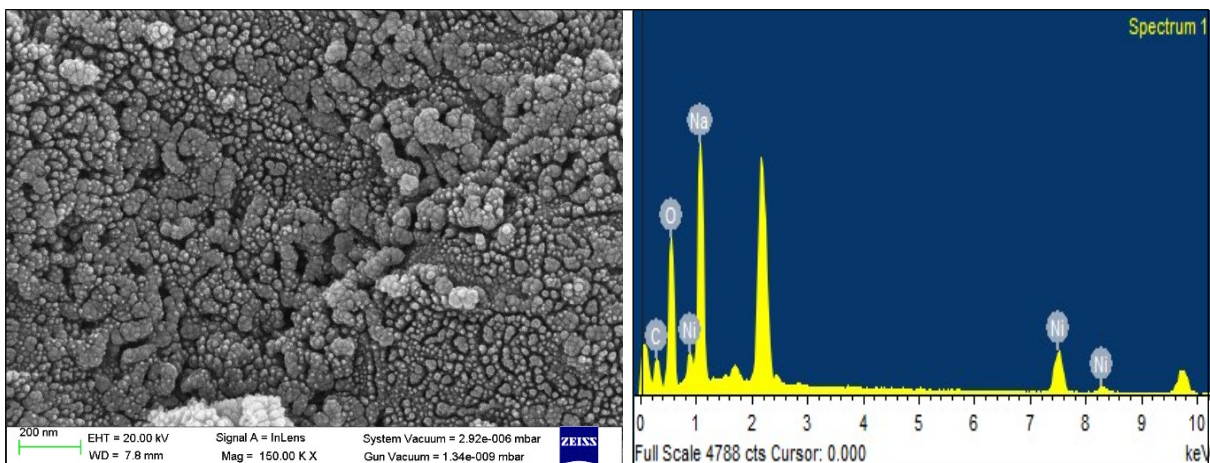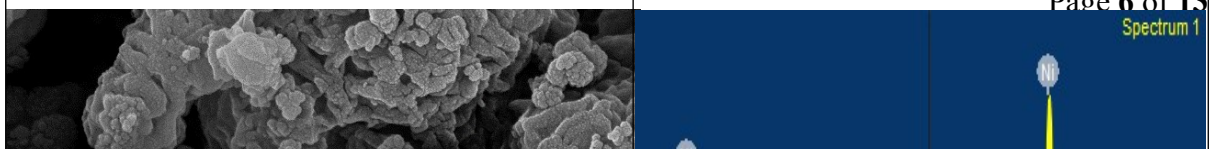

**Figure S4.** FE-SEM images with EDX of (A) NiO-PM, (B) NiO-PM EDX, (C) NiO-HT, (D) NiO-HT EDX, (E) NiO-SG, (F) NiO-SG EDX, (G) NiO-DC (H) NiO-DC EDX.

5. Catalyst screening for the CO<sub>2</sub> hydrogenation to formic acid

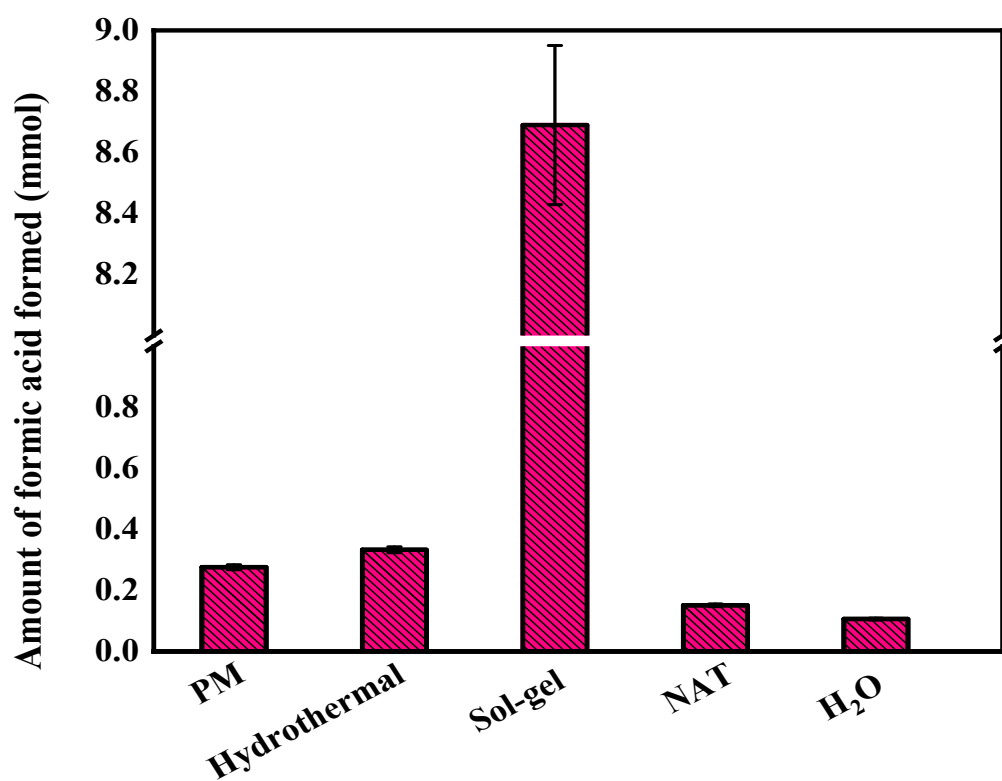

**Figure S5.** CO<sub>2</sub> hydrogenation to formic acid over various catalysts

Reaction condition: 200 °C, 60 bar pressure, 1 g catalyst, water as solvent.

6. <sup>1</sup>H NMR of the reaction mixture

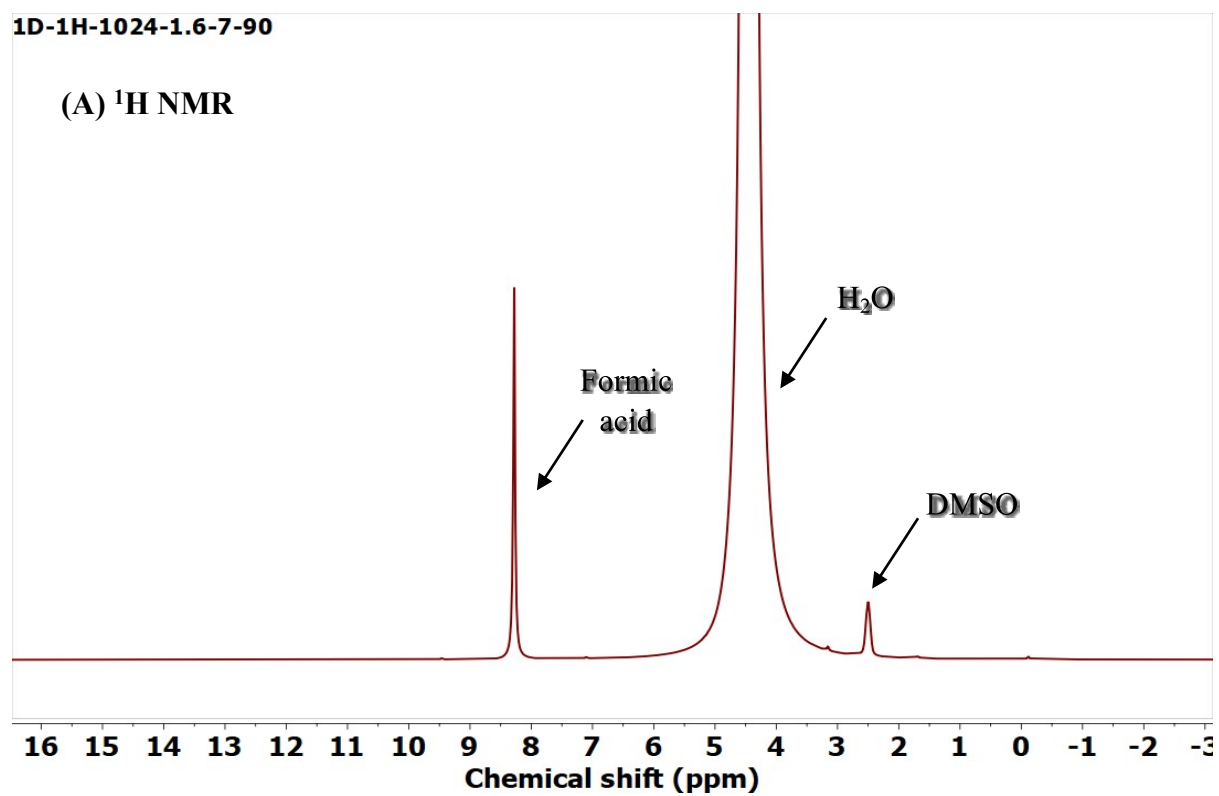



**Figure S6.** (A)  $^1\text{H}$  NMR of the reaction mixture with DMSO- $d_6$  as a reference<sup>5-7</sup>.

7. XRD pattern of nano-nickel catalyst

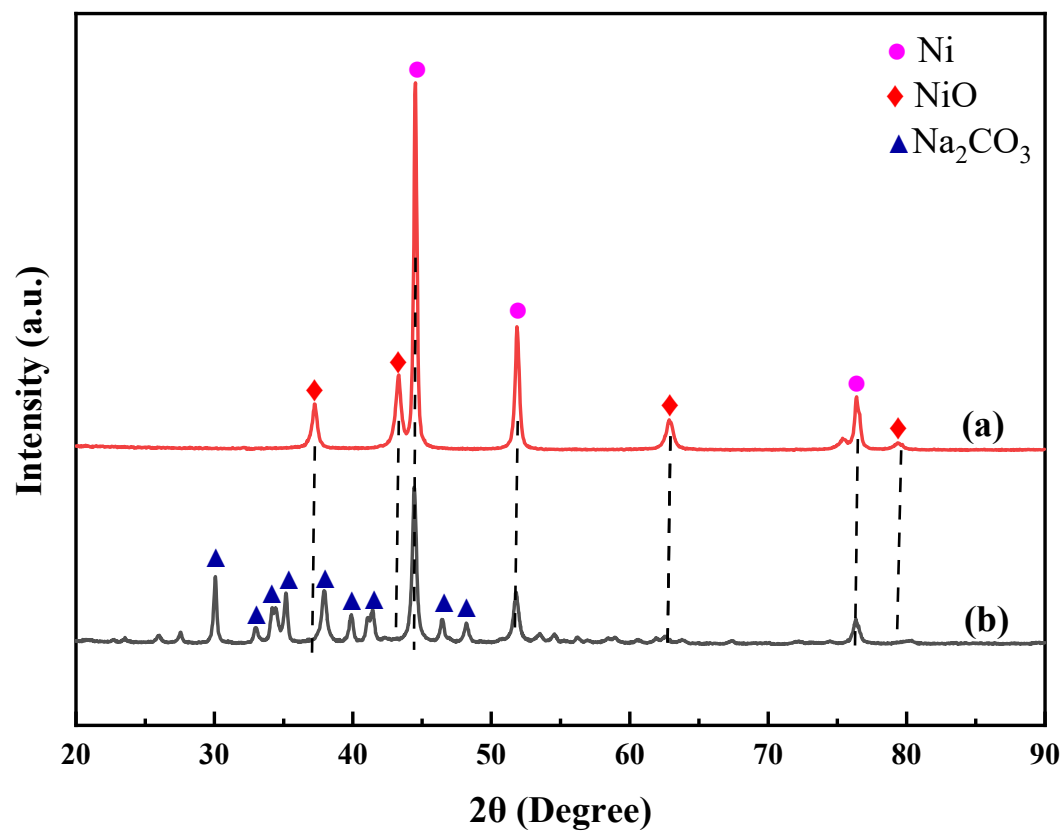

**Figure S7.** XRD pattern of nano-nickel catalyst (a) NiO-R1, (b) NiO-SG.

8. Formic acid yield for recycles experiments.

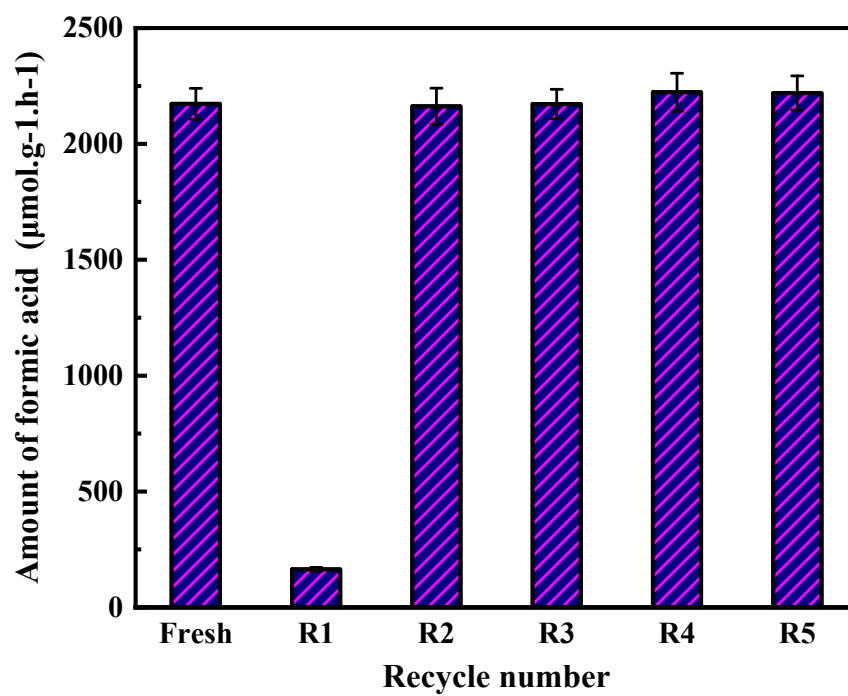

**Figure S8.** Formic acid yield in the recycles experiments.

**Table S1.** Results obtained from CO<sub>2</sub>-TPD for basic sites

| <b>Catalyst</b> | <b>Weak base<br/>(mmol/g-cat)</b> | <b>Moderate base<br/>(mmol/g-cat)</b> | <b>Strong base<br/>(mmol/g-cat)</b> | <b>Total basic strength<br/>(mmol/g-cat)</b> |
|-----------------|-----------------------------------|---------------------------------------|-------------------------------------|----------------------------------------------|
| NiO-PM          | <b>0.0012</b>                     | <b>0.0033</b>                         | <b>0.0056</b>                       | <b>0.0101</b>                                |
| NiO-HT          | <b>0.0012</b>                     | <b>0.0080</b>                         | <b>0.0133</b>                       | <b>0.0225</b>                                |
| NiO-SG          | -                                 | -                                     | <b>0.1079</b>                       | <b>0.1079</b>                                |
| NiO-DC          | <b>0.0010</b>                     | <b>0.0006</b>                         | <b>0.0020</b>                       | <b>0.0036</b>                                |

10. Selected factors with their corresponding coded values

**Table S2.** Selected factors with their corresponding coded values

| <b>Factor</b> | <b>Name</b>                                       | <b>(-<math>\alpha</math>)</b> | <b>-1</b>    | <b>0</b>      | <b>+1</b>     | <b>(+<math>\alpha</math>)</b> |
|---------------|---------------------------------------------------|-------------------------------|--------------|---------------|---------------|-------------------------------|
| <b>A</b>      | <b>Temperature (°C)</b>                           | <b>20.00</b>                  | <b>50.00</b> | <b>125.00</b> | <b>200.00</b> | <b>230.00</b>                 |
| <b>B</b>      | <b>Catalyst loading (g)</b>                       | <b>0.0400</b>                 | <b>0.20</b>  | <b>0.60</b>   | <b>1.00</b>   | <b>1.16</b>                   |
| <b>C</b>      | <b>Feed ratio P(CO<sub>2</sub>/H<sub>2</sub>)</b> | <b>0.2000</b>                 | <b>0.50</b>  | <b>1.25</b>   | <b>2.00</b>   | <b>2.30</b>                   |

References

- 1 S. Yin, Y. Zeng, C. Li, X. Chen and Z. Ye, .
- 2 S. Joshi, S. Kalyanasundaram and V. Balasubramanian, *Appl. Spectrosc.*, 2013, **67**, 841–845.
- 3 U. Baig, A. Khan, M. A. Gondal, M. A. Dastageer and W. S. Falath, *Nanomaterials*, , DOI:10.3390/nano10061098.
- 4 N. Duraisamy, K. Kandiah, R. Rajendran, S. Prabhu, R. Ramesh and G. Dhanaraj, *Res. Chem. Intermed.*, 2018, **44**, 5653–5667.
- 5 Ö. Coşkuner, C. A. Castilla-Martinez, O. Sonzogni, E. Petit, U. B. Demirci and A. Kantürk Figen, *Int. J. Hydrogen Energy*, , DOI:10.1016/j.ijhydene.2021.12.236.
- 6 C. Fletcher, Y. Jiang and R. Amal, *Chem. Eng. Sci.*, 2015, **137**, 301–307.
- 7 B. D. Bankar, K. Ravi, R. J. Tayade and A. V. Biradar, *J. CO2 Util.*, 2023, **67**, 102315.
